# Supplementary figures and images for: Genome-wide identification and characterization of TALE superfamily genes in cotton reveals their functions in regulating secondary cell wall biosynthesis
Source: PubMed Central journal article supplement (PMC6798366; doi:10.1186/s12870-019-2026-1), 2019-10-17

**a**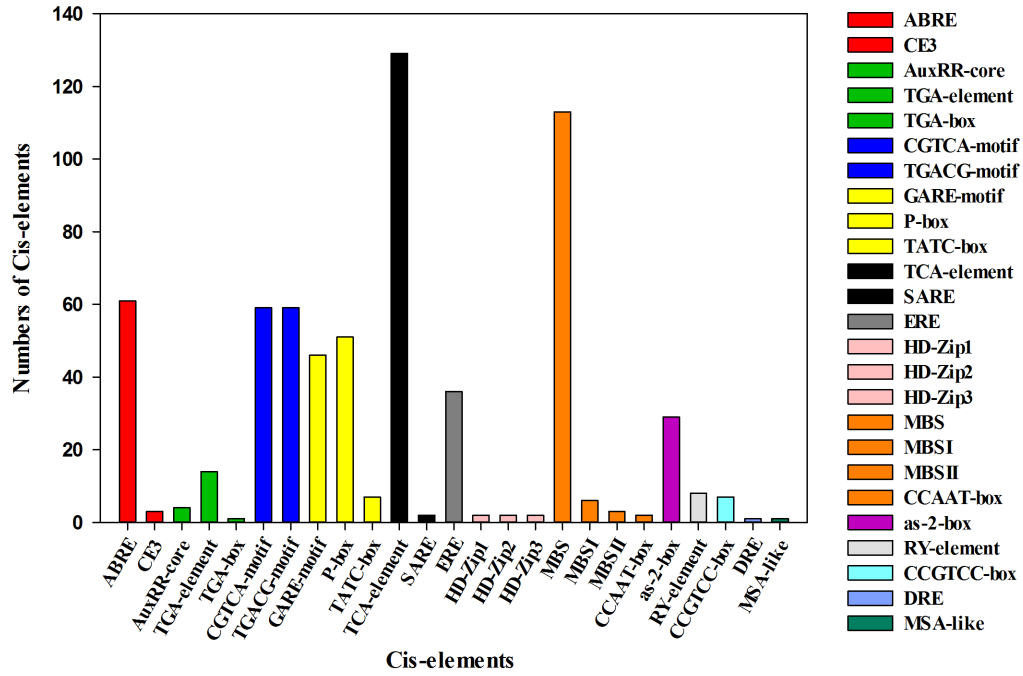**b**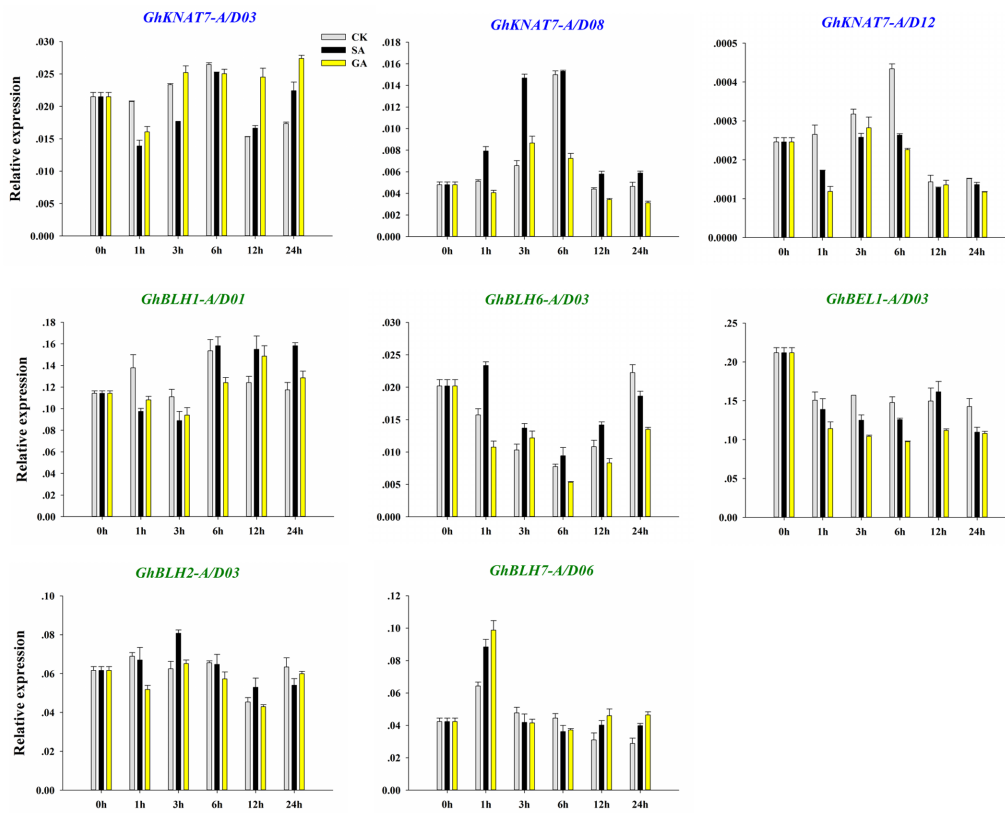

Supplement: 12870_2019_2026_MOESM2_ESM.pdf [file 12870_2019_2026_MOESM2_ESM.pdf]

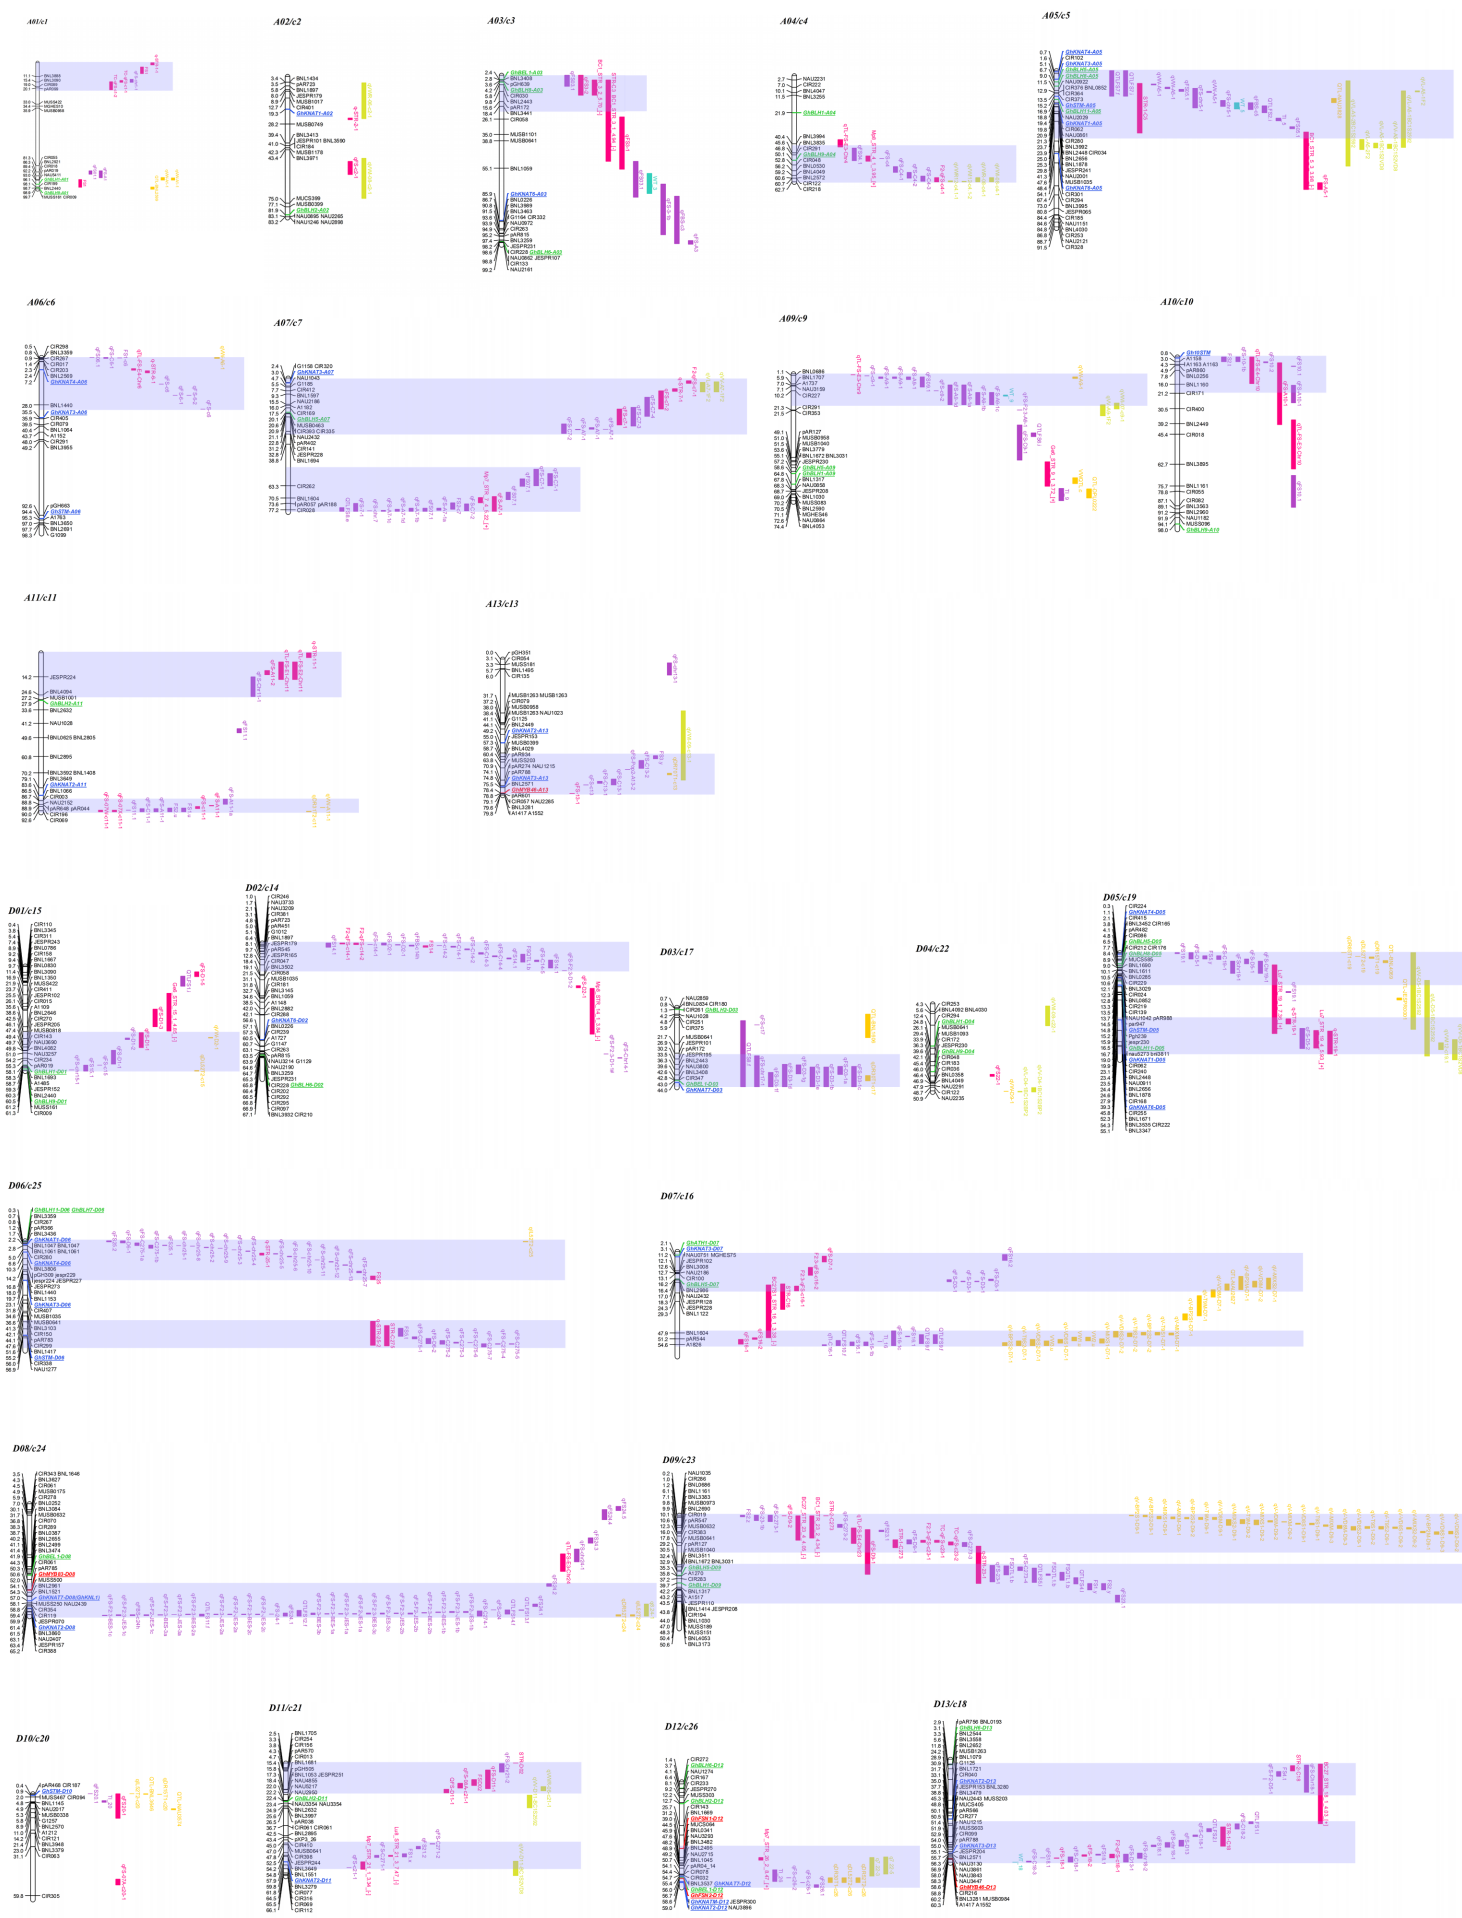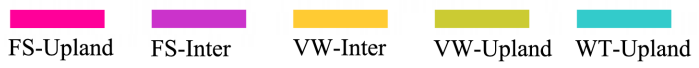

FS-Upland

FS-Inter

VW-Inter

VW-Upland

WT-Upland

Supplement: 12870_2019_2026_MOESM3_ESM.pdf [file 12870_2019_2026_MOESM3_ESM.pdf]
